# Supplementary material for: Rhinovirus Infections among Hematopoietic Stem Cell Transplant Recipients: A Pre-Transplant Dilemma?
Source: MDPI journal article supplement (doi:10.3390/v14020267), 2022-01-28
Supplement: s1 [file s1]

**Table S1: RVI in HSCT patients: global results.**

|                                                | Total              | hRV         | hCOV        | PIV         | FLU         | RSV         | hMPV        | ADV       | Boca      | EV        | PEV     |
|------------------------------------------------|--------------------|-------------|-------------|-------------|-------------|-------------|-------------|-----------|-----------|-----------|---------|
| <b>Total, n (%)</b>                            | <b>875</b>         | 323 (37)    | 151 (17)    | 123 (14)    | 87 (10)     | 85 (10)     | 39 (4)      | 38 (4)    | 17 (2)    | 9 (1)     | 3 (0.3) |
| <b>2009-10</b>                                 | <b>3</b>           | 2 (66.7)    | 0           | 0           | 0           | 0           | 1 (33.3)    | 0         | 0         | 0         | 0       |
| <b>2010-11</b>                                 | <b>23</b>          | 10 (43.3)   | 0           | 5 (22)      | 1 (4.3)     | 4 (17.3)    | 0           | 3 (13)    | 0         | 0         | 0       |
| <b>2011-12</b>                                 | <b>58</b>          | 28 (48)     | 12 (21)     | 3 (5.2)     | 5 (8.6)     | 6 (10.3)    | 2 (3.4)     | 2 (3.4)   | 0         | 0         | 0       |
| <b>2012-13</b>                                 | <b>77</b>          | 31 (40.3)   | 8 (10.4)    | 12 (15.6)   | 14 (18.1)   | 8 (10.4)    | 3 (3.9)     | 1 (1.3)   | 0         | 0         | 0       |
| <b>2013-14</b>                                 | <b>142</b>         | 43 (34.5)   | 24 (16.6)   | 19 (13.1)   | 13 (9)      | 17 (11.7)   | 9 (6.2)     | 8 (5.5)   | 5 (3.4)   | 3 (33)    | 1 (33)  |
| <b>2014-15</b>                                 | <b>133</b>         | 32 (25.6)   | 35 (26.3)   | 20 (15)     | 13 (9.8)    | 17 (12.8)   | 6 (4.5)     | 6 (4.5)   | 3 (2.3)   | 1 (1)     | 0       |
| <b>2015-16</b>                                 | <b>103</b>         | 54 (53.8)   | 15 (14.4)   | 13 (12.5)   | 8 (7.7)     | 6 (5.8)     | 2 (1.9)     | 4 (3.9)   | 0         | 1 (1)     | 0       |
| <b>2016-17</b>                                 | <b>114</b>         | 45 (42.2)   | 19 (16.4)   | 17 (14.7)   | 2 (1.7)     | 12 (10.4)   | 8 (6.9)     | 7 (6)     | 2 (1.7)   | 2 (2)     | 0       |
| <b>2017-18</b>                                 | <b>105</b>         | 39 (39.6)   | 22 (20.7)   | 11 (10.4)   | 15 (14.2)   | 4 (3.8)     | 4 (3.8)     | 3 (2.8)   | 5 (4.7)   | 1 (1)     | 1 (33)  |
| <b>2018-19</b>                                 | <b>116</b>         | 38 (34.7)   | 16 (13.6)   | 23 (19.5)   | 16 (13.6)   | 11 (9.3)    | 4 (3.4)     | 4 (3.4)   | 2 (1.7)   | 1 (1)     | 1 (33)  |
| <b>Co-infections, n (%)</b>                    | <b>239 (27)</b>    | 63 (20)     | 49 (32)     | 38 (31)     | 19 (22)     | 25 (29)     | 16 (41)     | 12 (32)   | 9 (53)    | 5 (56)    | 3 (100) |
| <b>Upper respiratory sample, n (%)</b>         | <b>809 (92.5)</b>  | 297 (92)    | 140 (93)    | 117 (95)    | 83 (95)     | 78 (92)     | 35 (90)     | 33 (87)   | 16 (94)   | 8 (89)    | 2 (66)  |
| <b>Lower respiratory sample, n (%)</b>         | <b>32 (3.7)</b>    | 11 (3)      | 5 (3)       | 4 (3)       | 2 (5)       | 1 (1)       | 2 (5)       | 5 (13)    | 0         | 1 (11)    | 1 (33)  |
| <b>Upper + Lower respiratory sample, n (%)</b> | <b>34 (4)</b>      | 15 (5)      | 6 (4)       | 2 (2)       | 2 (5)       | 6 (7)       | 2 (5)       | 0         | 1 (6)     | 0         | 0       |
| <b>Shedding, mean day (SD)</b>                 | <b>26.6 (20.4)</b> | 27.2 (17.9) | 34.2 (21.6) | 23.3 (13.2) | 18.6 (24.9) | 32.5 (29.8) | 21.8 (14.8) | 7         | 10 (11.3) | NA        | NA      |
| <b>First RVI, post, mean day (SD)</b>          | <b>334 (338)</b>   | 227 (262)   | 364 (369)   | 382 (340)   | 371 (323)   | 409 (363)   | 503 (418)   | 279 (340) | 501 (435) | 394 (432) | 95 (31) |

RVI= respiratory viral infection; HSCT= hematopoietic stem cell transplant; hRV=human rhinovirus ; hCoV=human coronavirus ; PIV=parainfluenza virus ; FLU=influenza ; RSV=respiratory syncytial virus ; hMPV=human metapneumovirus ; ADV=a denovirus ; Boca=bocavirus ; EV=enterovirus ; PEV=parechovirus ; n=number ; SD=standard deviation ; Tx= transplantation ; IQR=interquartile rang
